# Supplementary material for: Determination of Five Phosphodiesterase-5 Inhibitors in Multiple Honey-Based Consumer Products by Chromatographic Technique in Rat Plasma
Source: MDPI journal article supplement (doi:10.3390/pr11103019), 2023-10-20
Supplement: s1 [file s1]

Archive with 1 entries (1 files):
- processes-2640818-supplementary.pdf
