# Supplementary material for: Determination of Five Phosphodiesterase-5 Inhibitors in Multiple Honey-Based Consumer Products by Chromatographic Technique in Rat Plasma
Source: MDPI journal article supplement (doi:10.3390/pr11103019), 2023-10-20
Supplement: s1 [file s1 › processes-2640818-supplementary.pdf]

**Supplementary Table S1: Chromatographic Conditions**

| <b>Chromatographic Conditions</b> |                                                                                                                                                                                                                                                                                                                                                    |
|-----------------------------------|----------------------------------------------------------------------------------------------------------------------------------------------------------------------------------------------------------------------------------------------------------------------------------------------------------------------------------------------------|
| <b>Column</b>                     | Hipersil C18- (150mm x 4.6 mm, 5µm)                                                                                                                                                                                                                                                                                                                |
| <b>Mobil phase</b>                | A10 mL of Triethylamine was dissolved in 1000 mL of water of HPLC grade and pH 5.8 was adjusted using orthophosphoric acid 85% solution. 570 mL of acetonitrile was added to the previously prepared 430 mL of Triethylamine counter ion solution, mixed well, filtered through 0.45 µm nylon membrane, and sonicated for 10 minutes' prior usage. |
| <b>Rinsing solution</b>           | Methanol :water (1:1)                                                                                                                                                                                                                                                                                                                              |
| <b>Sample cooler temperature</b>  | 25                                                                                                                                                                                                                                                                                                                                                 |
| <b>injection volume</b>           | 20 µL                                                                                                                                                                                                                                                                                                                                              |
| <b>Run time</b>                   | 15 minutes                                                                                                                                                                                                                                                                                                                                         |
| <b>Flow rate</b>                  | 1.0 mL/minute                                                                                                                                                                                                                                                                                                                                      |
| <b>wavelength</b>                 | 250                                                                                                                                                                                                                                                                                                                                                |

**Supplementary Table S2:** Honey samples were collected from different governorates in the kingdom of Jordan

| <b>Sample ID</b> | <b>Sources</b>     | <b>Weight of Sample (g)</b> |
|------------------|--------------------|-----------------------------|
| Sample 1         | South of Amman     | 5.10                        |
| Sample 2         | North of Amman     | 5.20                        |
| Sample 3         | West of Amman      | 5.05                        |
| Sample 4         | East of Amman      | 4.97                        |
| Sample 5         | Downtown Amman (1) | 5.80                        |
| Sample 6         | Downtown Amman (2) | 5.40                        |
| Sample 7         | Downtown Amman (3) | 5.60                        |
| Sample 8         | Ajloun             | 5.00                        |
| Sample 9         | Jerash             | 5.41                        |
| Sample 10        | Irbid              | 5.32                        |
| Sample 11        | Karak              | 5.14                        |
| Sample 12        | Tafila             | 5.32                        |

**Supplementary Table S3:** the results of weighing and finely powdering twenty pills representing the various dose types

| Tablets              | the factory           | Trade Name |
|----------------------|-----------------------|------------|
| 1. Sildenafil tablet | (Dar al Dawa, Jordan) | (Aphrodil) |
| 2. Tadalafil tablet  | (Dar al Daw, Jordan)  | (Tyra)     |
| 3. Vardenafil tablet | (Bayer, Jordan)       | (Levetra)  |
| 4. Avanafil tablet   | (EMC)                 | (Spedra)   |
| 5. Udenafil tablet   | (Zydny)               | (Udzera)   |

**Supplementary Table S4: Specificity test - Loss in potency for sildenafil**

| <b>Condition</b>  | <b>Assay%</b> | <b>Loss%</b> |
|-------------------|---------------|--------------|
| <b>Normal</b>     | 100           | 0            |
| <b>Heat</b>       | 100           | 0            |
| <b>Hydrolysis</b> | 100           | 0            |
| <b>Acid</b>       | 63.17         | 36.83        |
| <b>Base</b>       | 72.3          | 27.7         |
| <b>Oxidation</b>  | 100           | 0            |
| <b>Photolysis</b> | 100           | 0            |

**Supplementary Table S5: Specificity test - Loss in potency for udenafil**

| <b>Condition</b>  | <b>Assay%</b> | <b>Loss%</b> |
|-------------------|---------------|--------------|
| <b>Normal</b>     | 100           | 0            |
| <b>Heat</b>       | 100           | 0            |
| <b>Hydrolysis</b> | 100           | 0            |
| <b>Acid</b>       | 65.34         | 34.66        |
| <b>Base</b>       | 69.3          | 30.7         |
| <b>Oxidation</b>  | 100           | 0            |
| <b>Photolysis</b> | 100           | 0            |

**Supplementary Table S6: Specificity test - Loss in potency for Vardenafil**

| <b>Condition</b>  | <b>Assay%</b> | <b>Loss%</b> |
|-------------------|---------------|--------------|
| <b>Normal</b>     | 100           | 0            |
| <b>Heat</b>       | 100           | 0            |
| <b>Hydrolysis</b> | 100           | 0            |
| <b>Acid</b>       | 73.34         | 26.66        |
| <b>Base</b>       | 81.3          | 18.7         |
| <b>Oxidation</b>  | 100           | 0            |
| <b>Photolysis</b> | 100           | 0            |

**Supplementary Table S7: Specificity test - Loss in potency for Avanafil**

| <b>Condition</b>  | <b>Assay%</b> | <b>Loss%</b> |
|-------------------|---------------|--------------|
| <b>Normal</b>     | 100           | 0            |
| <b>Heat</b>       | 100           | 0            |
| <b>Hydrolysis</b> | 100           | 0            |
| <b>Acid</b>       | 80.14         | 19.86        |
| <b>Base</b>       | 91.4          | 8.6          |
| <b>Oxidation</b>  | 100           | 0            |
| <b>Photolysis</b> | 100           | 0            |

**Supplementary Table S8: Specificity test - Loss in potency for Tadalafil**

| <b>Condition</b>  | <b>Assay%</b> | <b>Loss%</b> |
|-------------------|---------------|--------------|
| <b>Normal</b>     | 100           | 0            |
| <b>Heat</b>       | 92.4          | 7.6          |
| <b>Hydrolysis</b> | 100           | 0            |
| <b>Acid</b>       | 98            | 2            |
| <b>Base</b>       | 90.3          | 9.7          |
| <b>Oxidation</b>  | 79.7          | 20.3         |
| <b>Photolysis</b> | 100           | 0            |

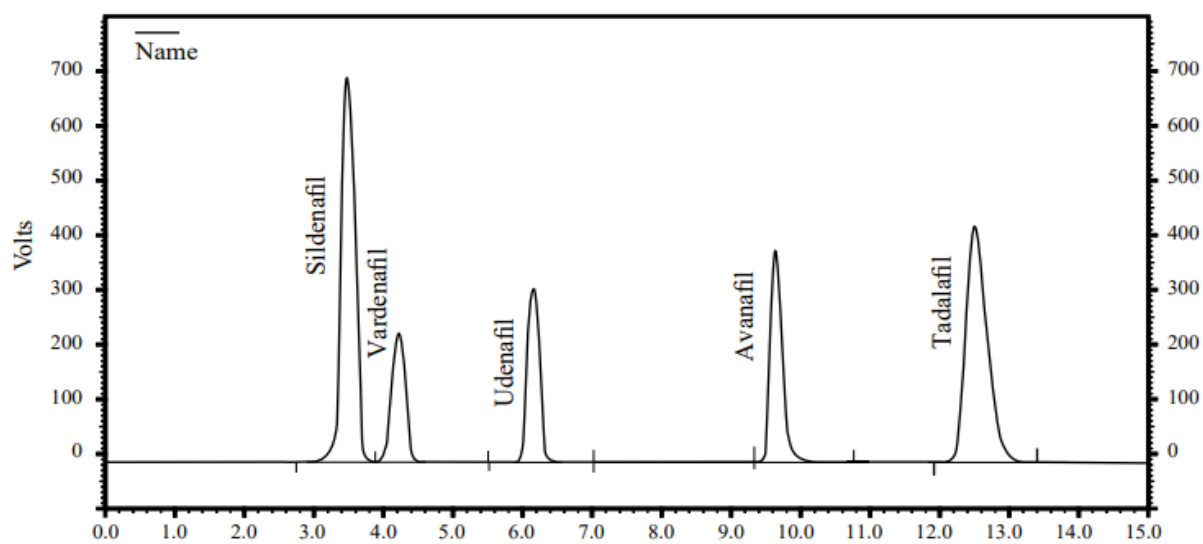

(a)

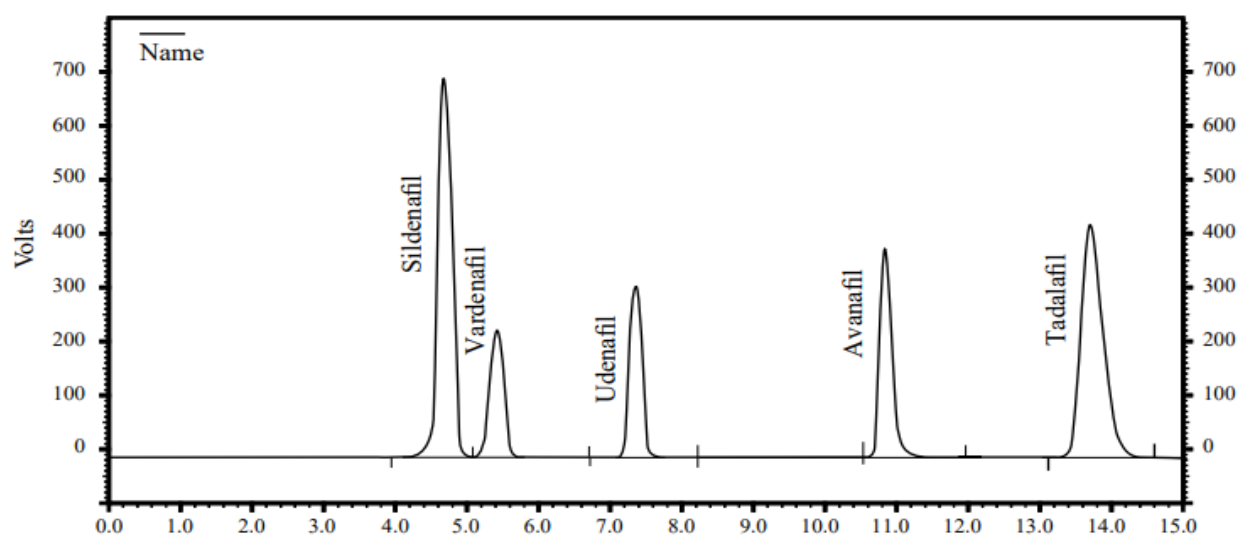

(b)

Supplementary Figure S1: Chromatogram Robustness Test – Modified Flow Rate Standard  
Solution (a) 1.2 mL /min (b) 0.8 mL /min

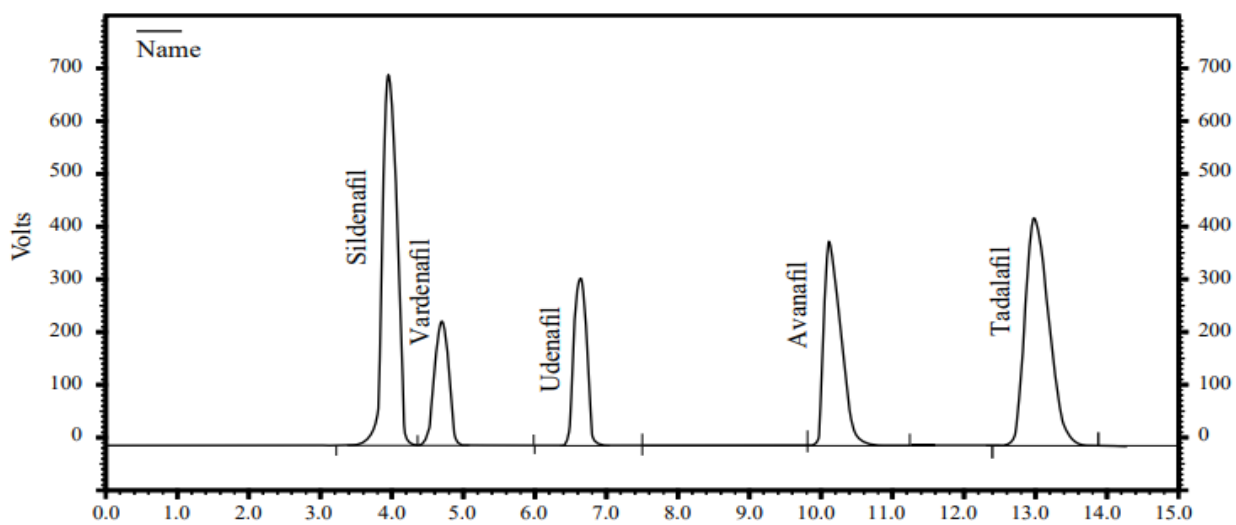

(a)

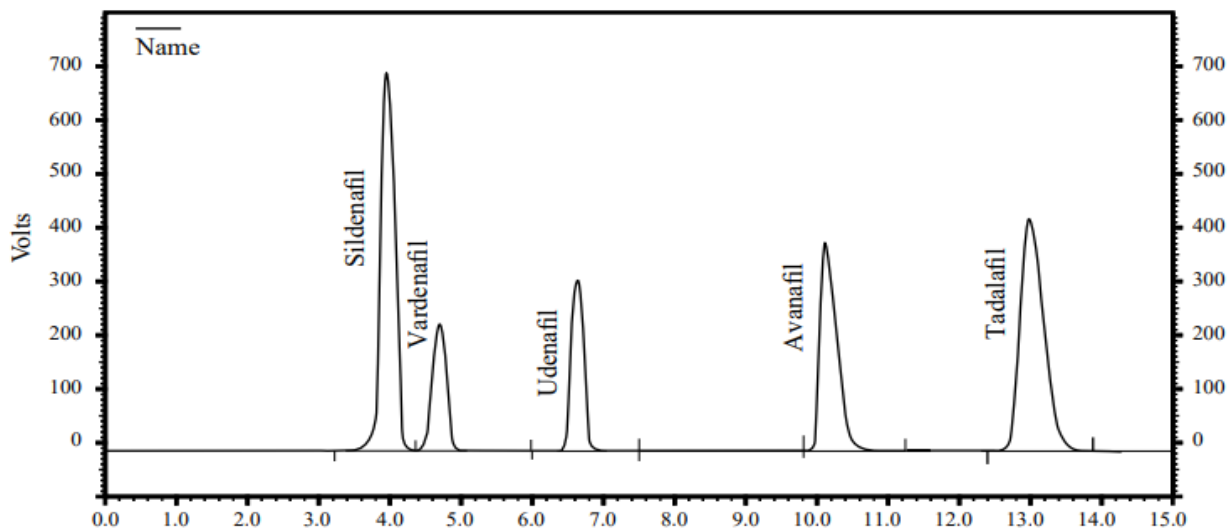

(b)

Supplementary Figure S2: Chromatogram Robustness Test – Modified Wavelength Standard  
Solution (a) 247 nm (b) 253 nm

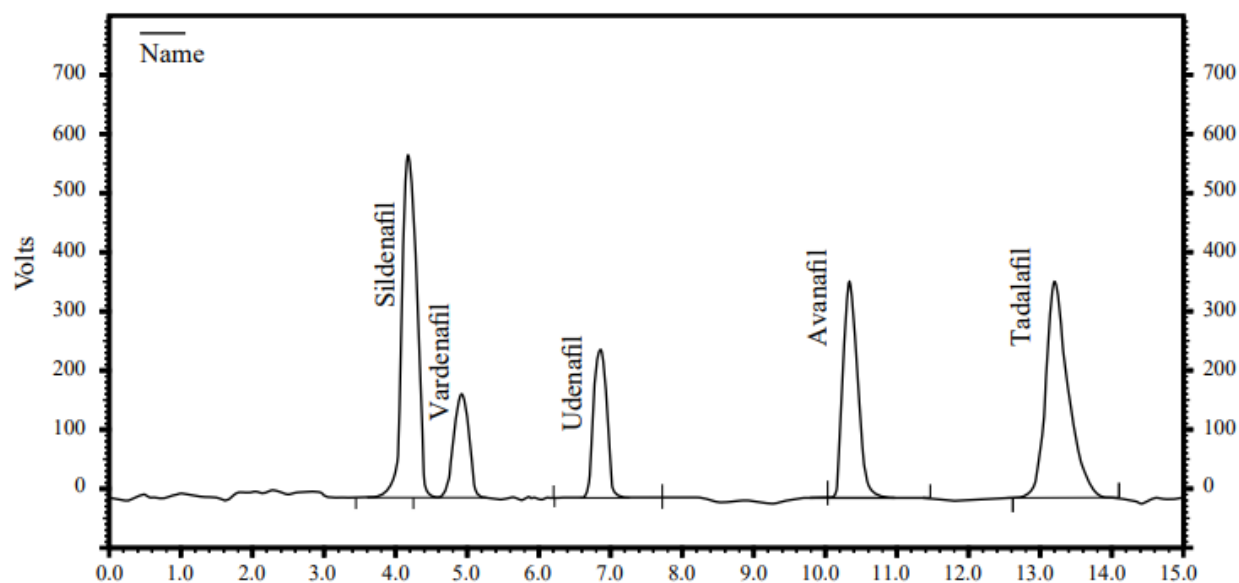

(a)

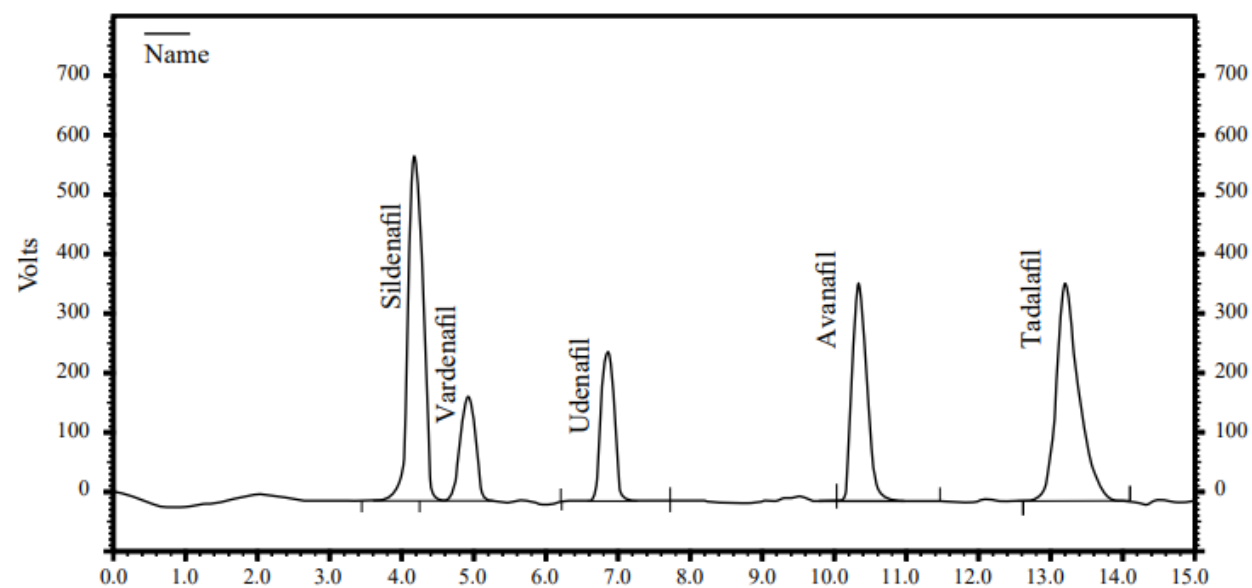

(b)

Supplementary Figure S3: Chromatogram Robustness Test – Modified Column Oven  
Temperature Standard Solution (a) 27° C (b) 23° C

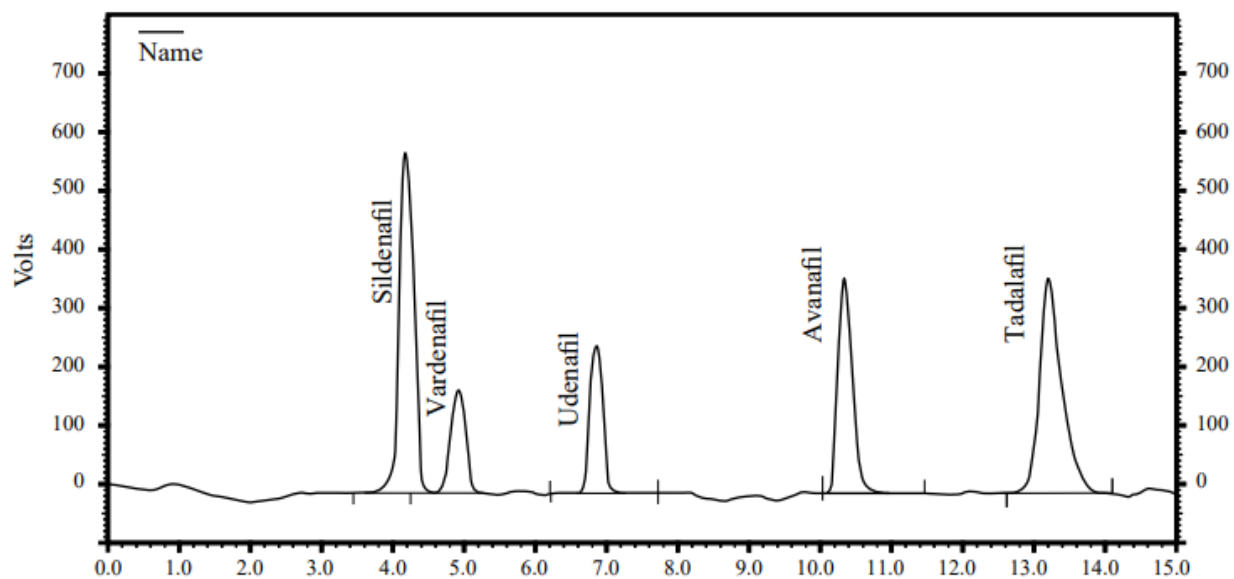

(a)

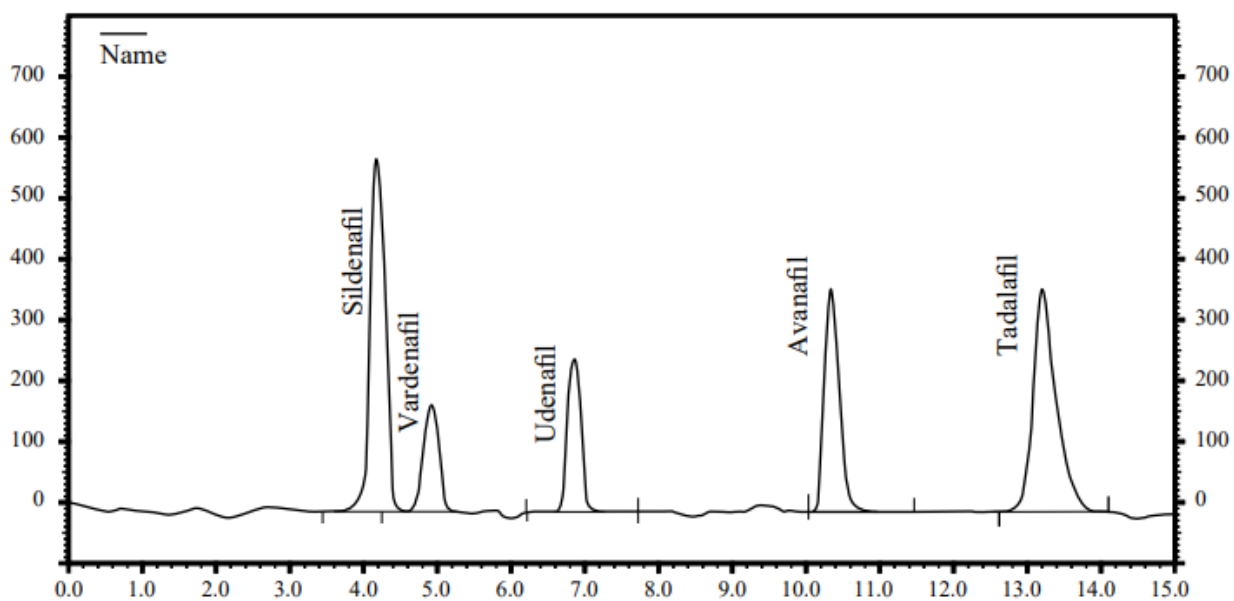

(b)

Supplementary Figure S4: Chromatogram Robustness Test – Modified pH Standard Solution (a) 5.7 (b) 5.9

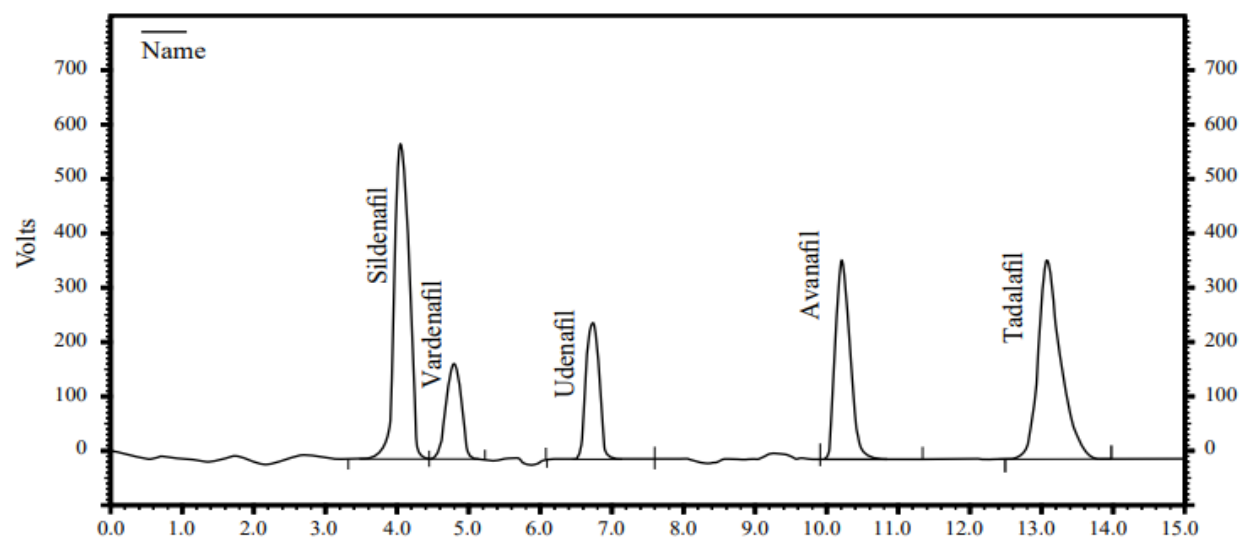

(a)

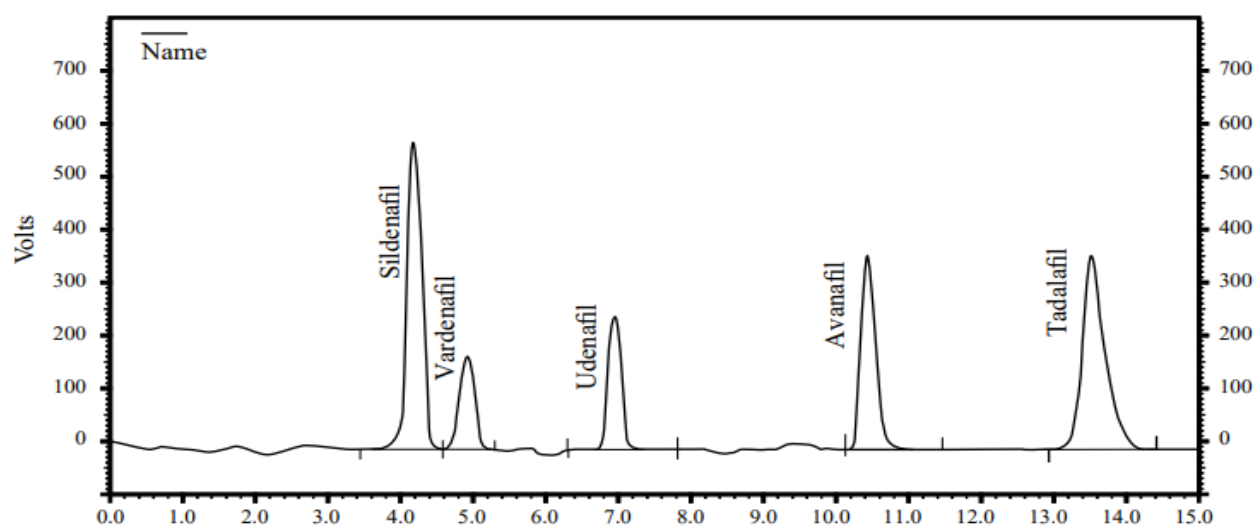

(b)

Supplementary Figure S5: Chromatogram Robustness Test – Modified Organic Solvent Composition Standard Solution (a) +3% (b) -3%

Supplementary Figures S6-S11 show overlapping five conditions in the same material.

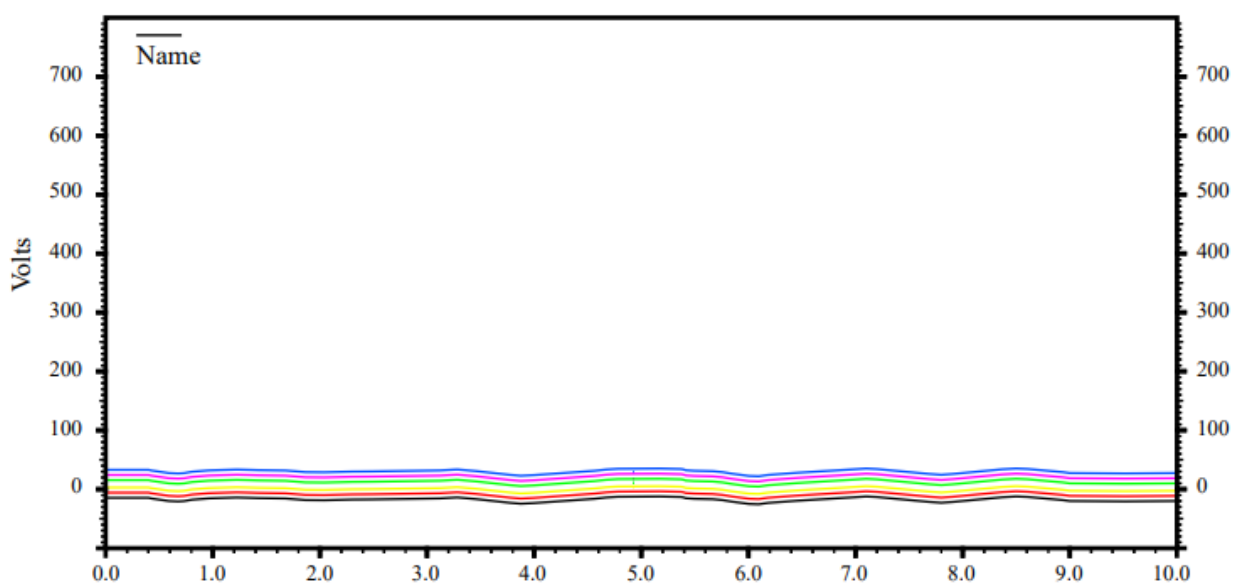

Figure S6: Chromatogram Specificity Test Diluent, Hydrolysis Acid, Base, Oxidation

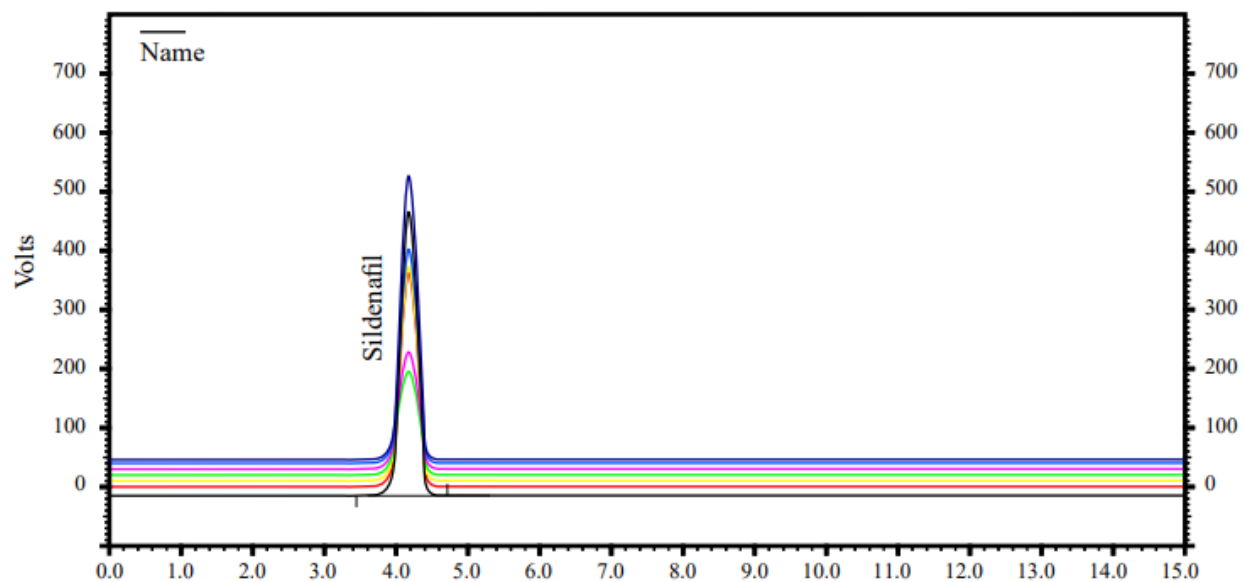

Figure S7: Chromatogram Specificity Test - Sildenafil, Heat, Hydrolysis, Acid, Base, Oxidation

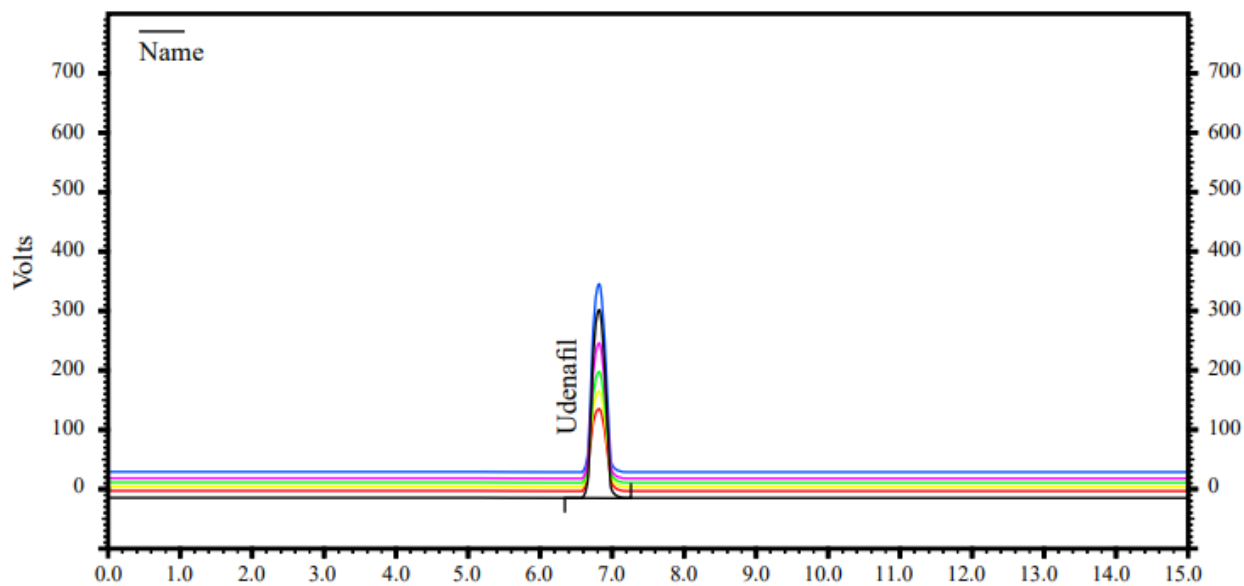

Figure S8: Chromatogram Specificity Test - Udenafil, Heat, Hydrolysis, Acid, Base, Oxidation

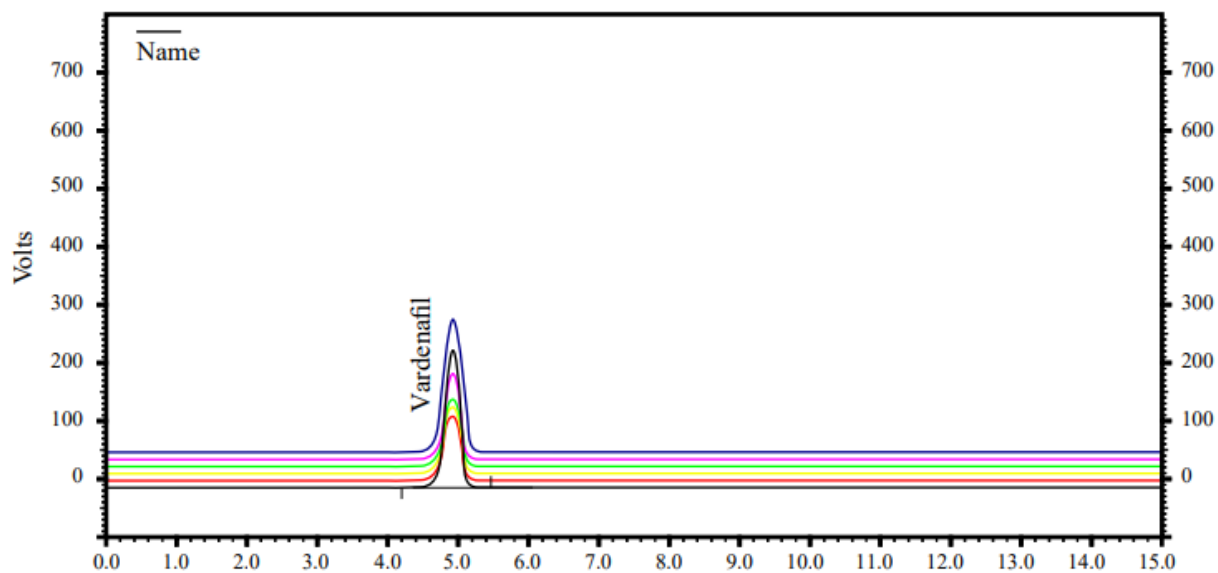

Figure S9: Chromatogram Specificity Test - Vardenafil, Heat, Hydrolysis, Acid, Base, Oxidation

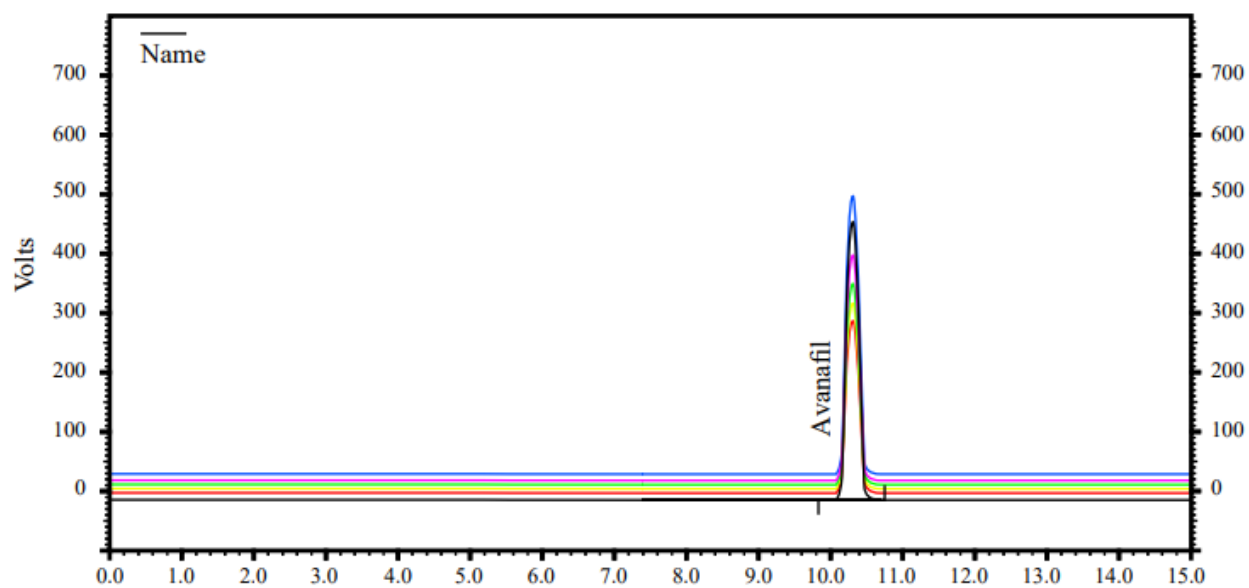

Figure S10: Chromatogram Specificity Test - Avanafil, Heat, Hydrolysis, Acid, Base, Oxidation

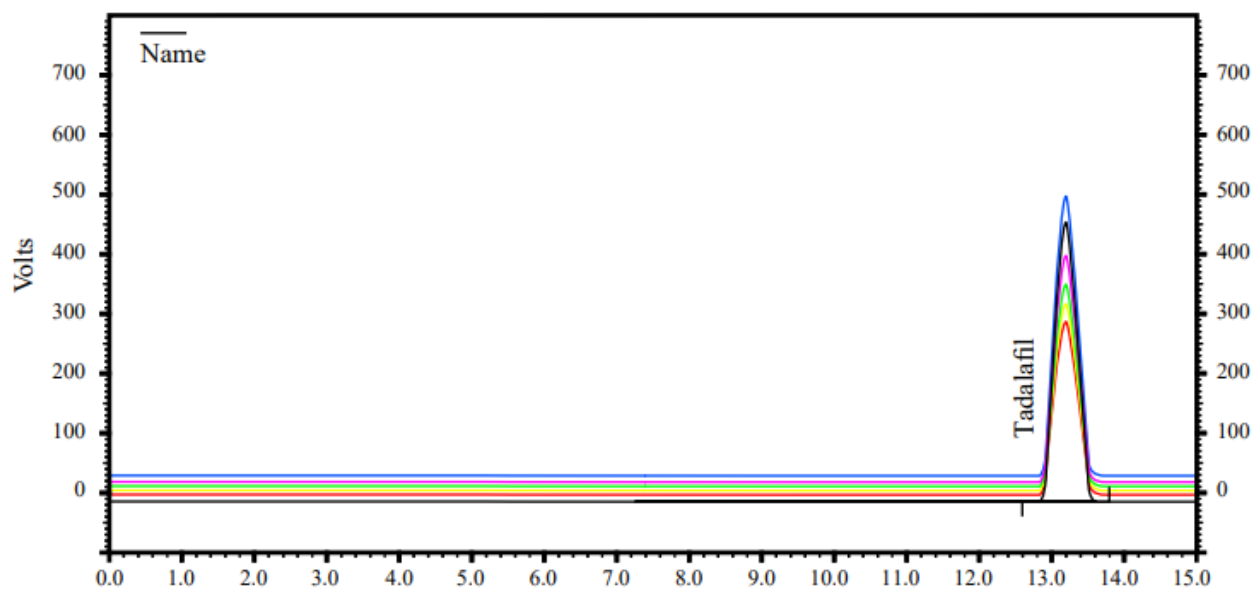

Figure S11: Chromatogram Specificity Test - Tadafil, Heat, Hydrolysis, Acid, Base, Oxidation
